# Supplementary material for: Doxorubicin-loaded polypyrrole nanovesicles for suppressing tumor metastasis through combining photothermotherapy and lymphatic system-targeted chemotherapy
Source: Royal Society of Chemistry journal article supplement (doi:10.1039/d2nr00186a), 2022-01-01
Supplement: d2nr00186a1.pdf [file d2nr00186a1.pdf]

## Supporting Information

### **Doxorubicin-loaded polypyrrole nanovesicles for suppressing tumor metastasis through combining photothermal therapy and lymphatic-targeted chemotherapy**

Lu Wang,<sup>a</sup> Genhua Liu,<sup>a</sup> Yunping Hu,<sup>b</sup> Shuangquan Gou,<sup>a</sup> Tingting He,<sup>a</sup> Qian Feng,<sup>a</sup>  
and Kaiyong Cai<sup>\*a</sup>

<sup>a</sup>Key Laboratory of Biorheological Science and Technology, Ministry of Education

College of Bioengineering, Chongqing University, Chongqing 400044, China.

E-mail: kaiyong\_cai@cqu.edu.cn

<sup>b</sup>Fujian Provincial Key Laboratory of Advanced Materials Oriented Chemical

Engineering, College of Chemistry and Materials Science, Fujian Normal University

Fuzhou, Fujian 350007, China.

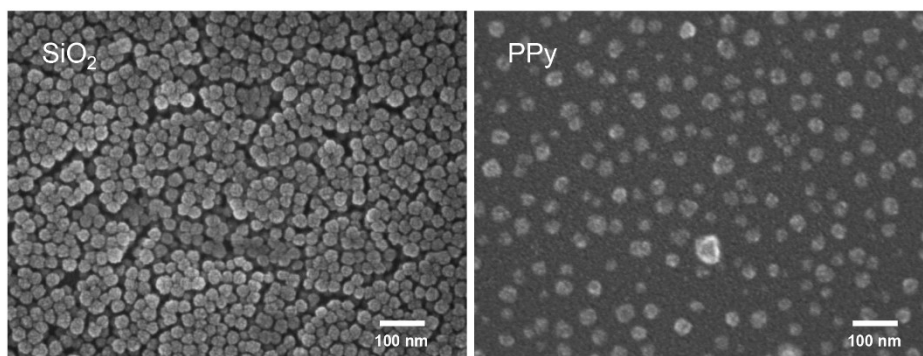

**Figure S1.** SEM images of SiO<sub>2</sub> NPs and PPy NVs.

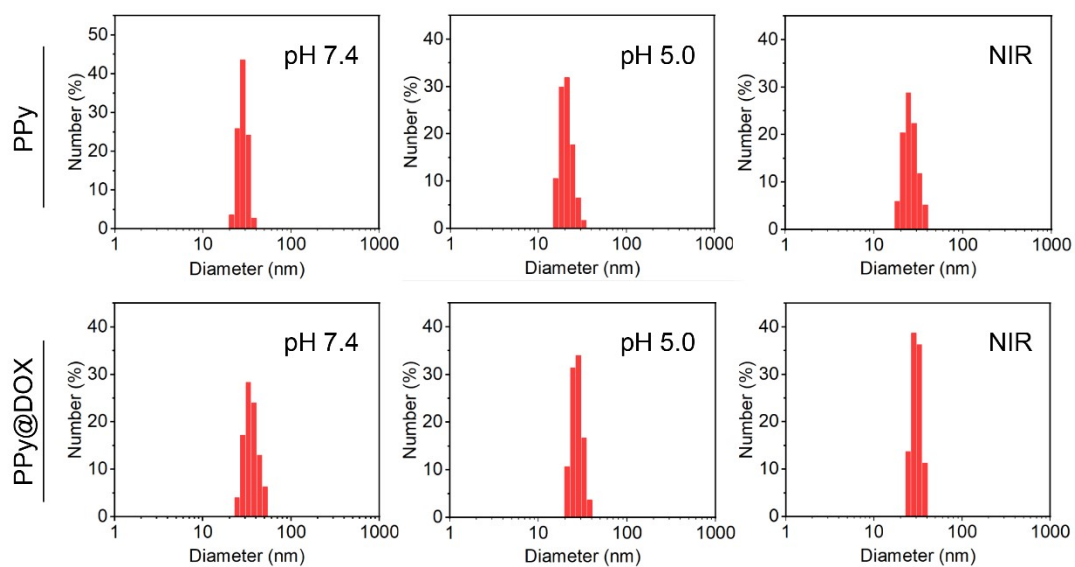

**Figure S2.** Size distribution of PPy and PPy@DOX NVs at pH 7.4, pH 5.0 and pH 7.4 after NIR treatment.

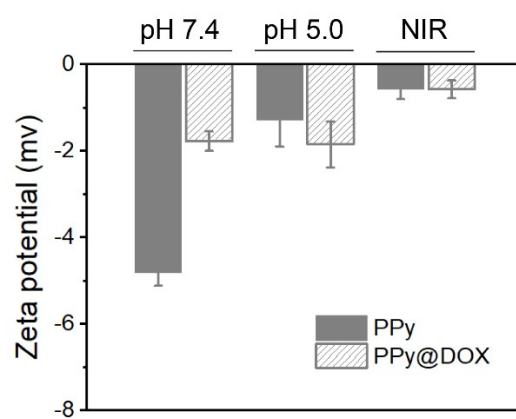

**Figure S3.** Surface zeta potential of PPy and PPy@DOX NVs at pH 7.4, pH 5.0 and pH 7.4 after NIR treatment.

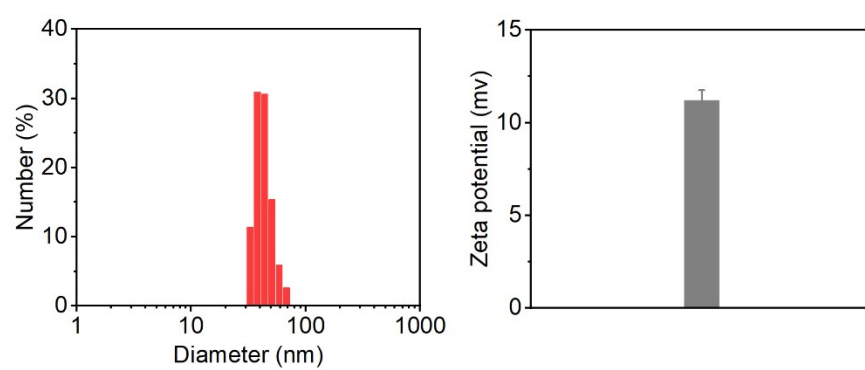

**Figure S4.** Size distribution and surface zeta potential of PEI/PPy NVs.

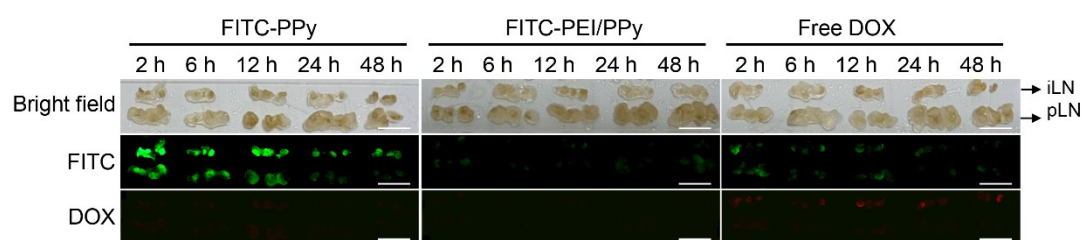

**Figure S5.** White light and fluorescence images of the lymph nodes isolated at given time points after the mice in each group received SC injection of FITC labeled PPy, PEI/PPy NVs and Free DOX, respectively (n=3). Scale bar: 5 mm.

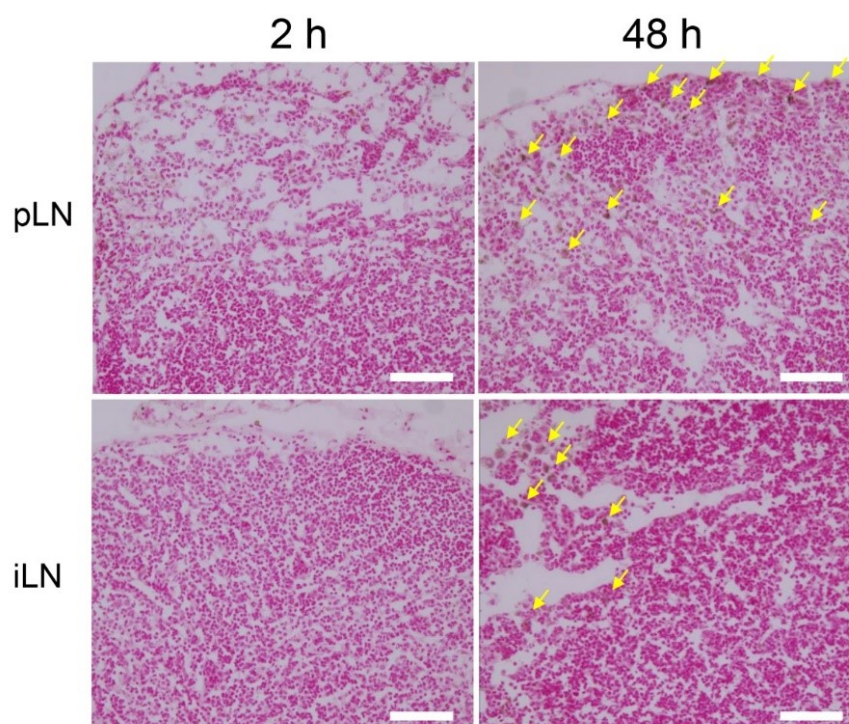

**Figure S6.** Representative pictures of the nuclear fast-staining of popliteal lymph nodes (pLNs) and inguinal lymph nodes (iLNs) at 2 h and 48 h after mice received SC injection of PPy@DOX NVs. Scale bar: 100  $\mu\text{m}$ .

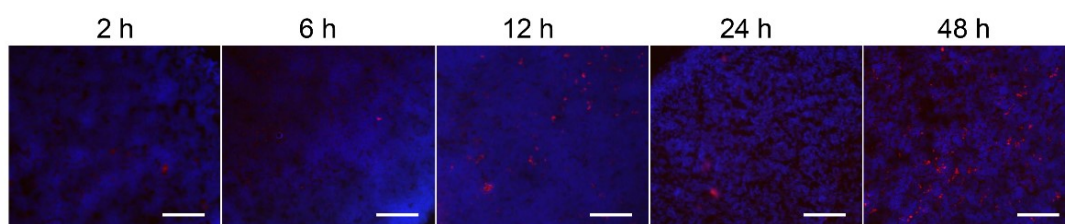

**Figure S7.** Fluorescence images of draining inguinal lymph node sections. The inguinal lymph nodes (iLNs) were obtained from tumor-bearing mice, which had been injected intratumorally with PPy@DOX NVs and sacrificed at various time points after administration. Scale bar: 100  $\mu$ m.

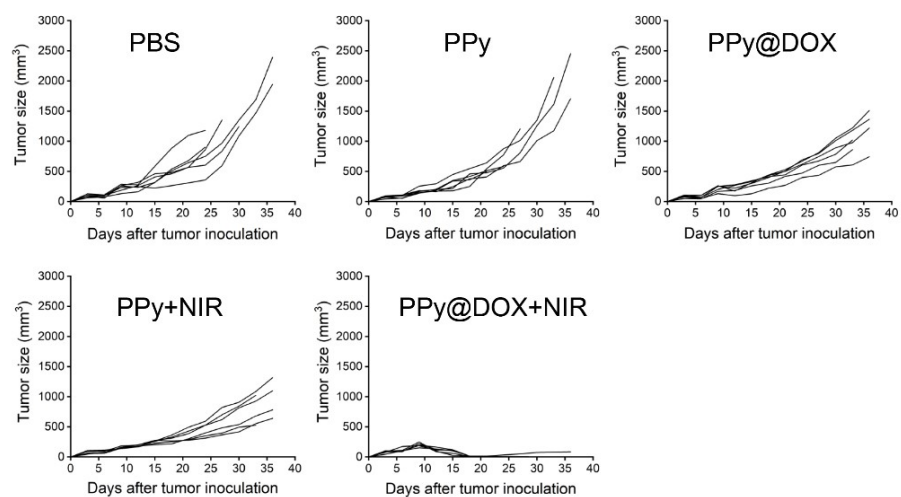

**Figure S8.** Individual tumor growth curves (n=6). Mice received different treatment regimens as described in experimental section.

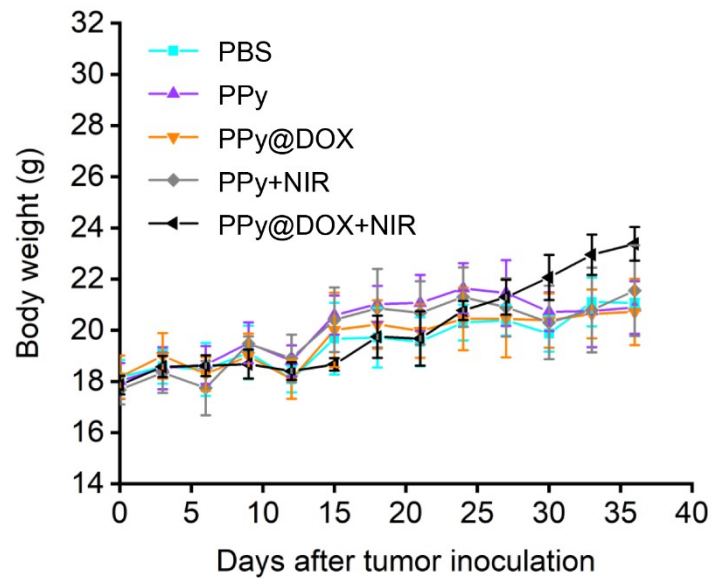

**Figure S9.** Body weights of the mice in each treated group.

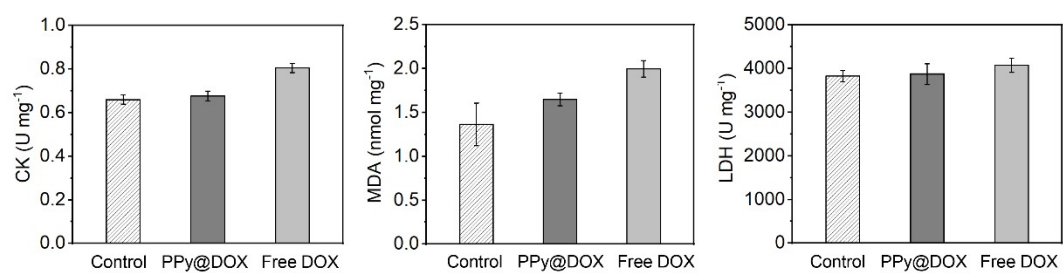

**Figure S10.** The levels of myocardial function indicators (CK, MDA and LDH) of the mice treated with PBS (control), PPy@DOX NVs and Free DOX.
